# Supplementary material for: High-Dose Capsaicin for the Treatment of Neuropathic Pain: What We Know and What We Need to Know
Source: Springer Nature journal article supplement (doi:10.1007/s40122-014-0027-1), 2014-07-28
Supplement: MOESM1 [file 9339862]

- Systemic drug treatment in neuropathic pain is often limited in efficacy and by adverse effects.
- In 2009 a high concentration transdermal capsaicin 8% patch (Qutenza<sup>®</sup>; Acorda Therapeutics, Inc., Ardsley, NY, USA; Astellas Pharma Europe Ltd., Chertsey, Surrey, UK) was introduced for the treatment of peripheral neuropathic pain syndromes other than of diabetic origin in adults.
- Randomized, double-blind, placebo-controlled studies show the efficacy of Qutenza in patients with postherpetic neuralgia and painful human immunodeficiency virus (HIV)-associated neuropathy.
- In a large non-interventional study, 43% of patients receiving Qutenza had a 30% pain relief.
- Qutenza is a valuable addition to the analgesic options against neuropathic pain in adults; biomarkers that predict treatment response are desirable.

This summary slide represents the opinions of the authors. No funding or sponsorship was received for this study or publication of this article. For a full list of acknowledgments and conflicts of interest for all authors of this article, please see the full text online. Copyright © The Author(s) 2014. Creative Commons Attribution Noncommercial License (CC BY-NC).
